# Supplementary material for: Plasticized Polystyrene by Addition of -Diene Based Molecules for Defect-Less CVD Graphene Transfer
Source: MDPI journal article supplement (doi:10.3390/polym12081839), 2020-08-17
Supplement: s1 [file s1]

## Supplementary Informations

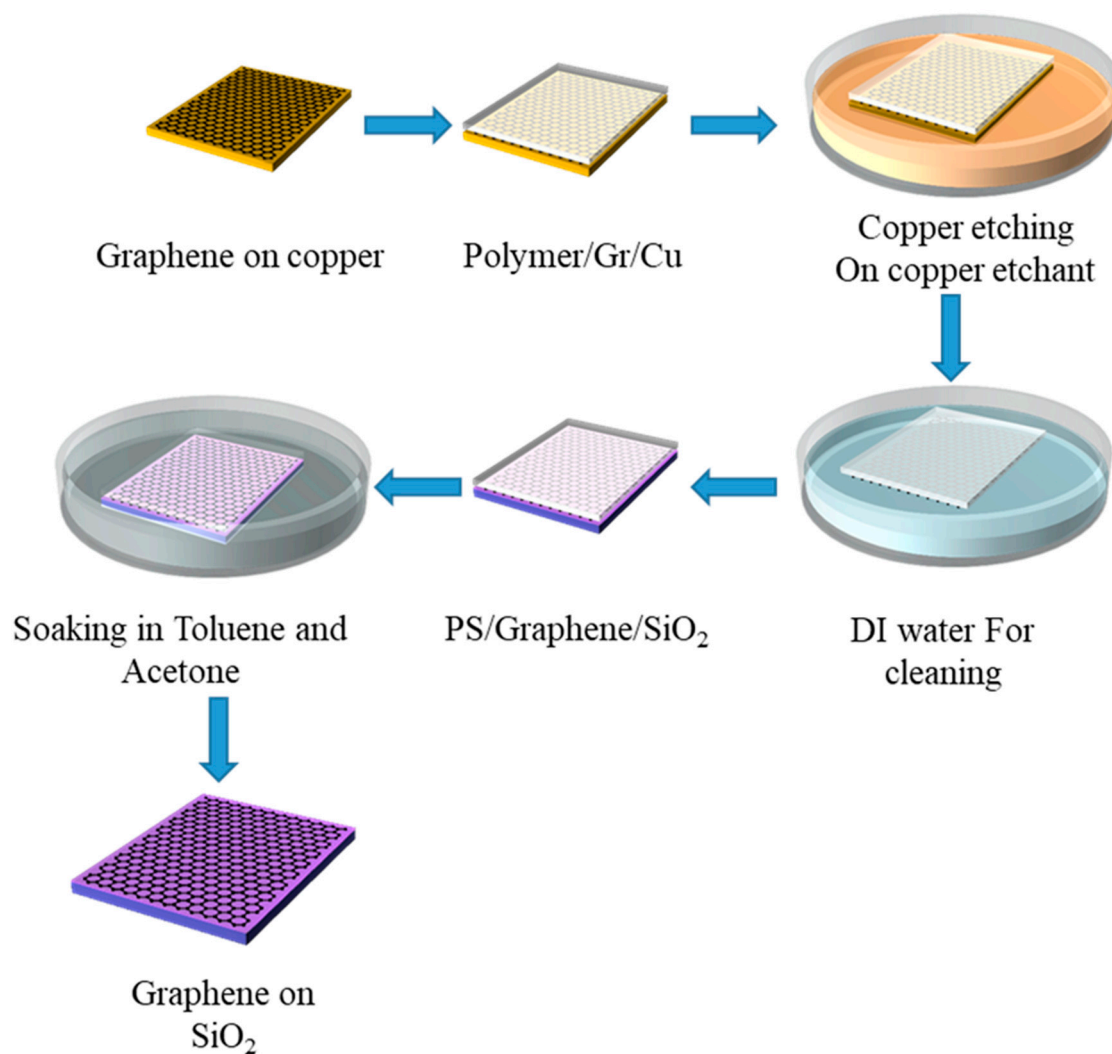

**Figure S1.** Schematic of conventional graphene transfer method on SiO<sub>2</sub> substrate.

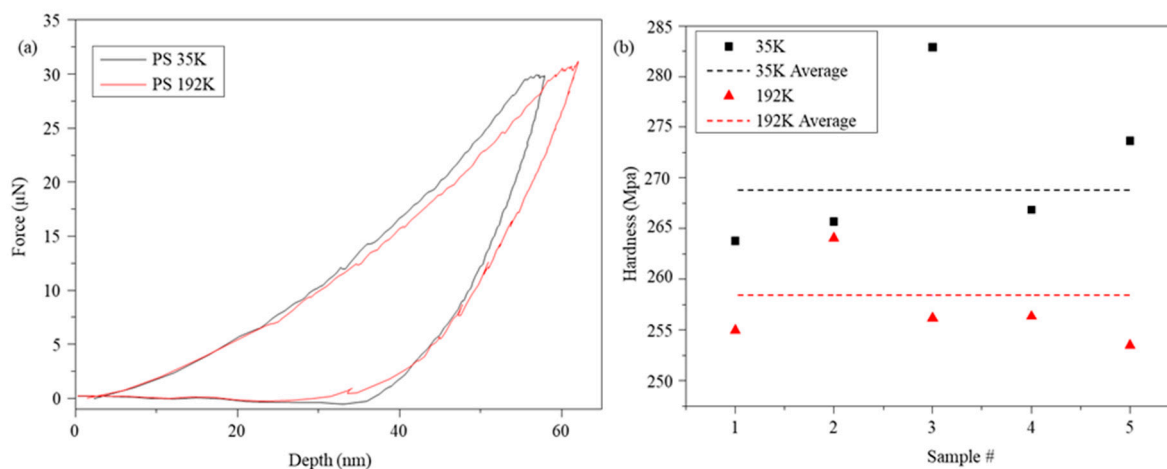

**Figure S2.** Nano-indentation test (a) and hardness comparison (b) for different Molecular Weight Polystyrene film.

| Supporting Layer Composition   | OM of Graphene after Transfer                                                       |                                                                                      |
|--------------------------------|-------------------------------------------------------------------------------------|--------------------------------------------------------------------------------------|
| PMMA                           | 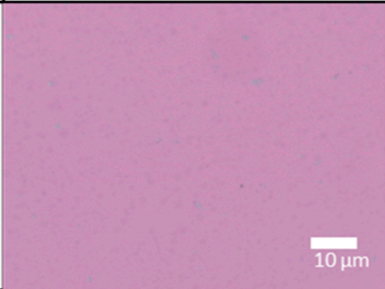   |    |
| PolyStyrene 100%               |    |    |
| PolyStyrene 85%, Hexadiene 15% |   |   |
| PolyStyrene 85%, Octadiene 15% |  |  |
| PolyStyrene 85%, Decadiene 15% |  |  |

**Figure S3.** Bright and dark field optical microscope images of graphene transfer by different polymer support layers.
